1 Title (20 words): **Anxiety enhances pain in a model of osteoarthritis and is**  
2 **associated with altered endogenous opioid function and reduced opioid**  
3 **analgesia**

4  
5 Authors: Amanda Lillywhite<sup>a,b,\*</sup>, Stephen G. Woodhams<sup>a,b,\*</sup>, David J. G. Watson<sup>b</sup>, Li  
6 Li<sup>a,b</sup>, James J. Burston<sup>a,b</sup>, Peter R. W. Gowler<sup>a,b</sup>, Meritxell Canals<sup>b,c</sup>, David A.  
7 Walsh<sup>a,d,e</sup>, Gareth J. Hathway<sup>a,b,e</sup>, Victoria Chapman<sup>a,b,e,f</sup>

8 \* These authors contributed equally to this work

9

10 Addresses:

11 <sup>a</sup> Pain Centre Versus Arthritis, University of Nottingham, Medical School, Queen's  
12 Medical Centre, Nottingham, United Kingdom

13 <sup>b</sup> School of Life Sciences, Medical School, Queen's Medical Centre, Nottingham,  
14 United Kingdom

15 <sup>c</sup> Centre of Membrane Proteins and Receptors, Universities of Birmingham and  
16 Nottingham, Midlands, UK.

17 <sup>d</sup> School of Medicine, University of Nottingham, Nottingham, United Kingdom

18 <sup>e</sup> NIHR Nottingham Biomedical Research Centre, University of Nottingham,  
19 Nottingham, United Kingdom

20 <sup>f</sup> Corresponding author. [victoria.chapman@nottingham.ac.uk](mailto:victoria.chapman@nottingham.ac.uk)

21

22 Abbreviated Title (42 characters): **Anxiety & opioid analgesia in chronic pain**

23

24 41 pages, 5 figures, 1 table

25

26 Abstract 238 words, introduction 629 words, discussion 1138 words

27

28 **Conflict of interest statement:** The authors declare no competing financial

29 interests.

30

31 **Acknowledgements:** This work was supported by Arthritis Research United

32 Kingdom (grants 18769, 20777) and the Medical Research Council (studentship

33 1653552). The authors wish to thank Rob Lane (University of Nottingham) for

helpful discussions and advice on opioid receptor pharmacology.

34 **Abstract** (239)

35 Chronic pain states such as osteoarthritis (OA) are often associated with negative  
36 affect, including anxiety and depression. This is, in turn, associated with greater  
37 opioid analgesic use, potentially contributing to current and future opioid crises. We  
38 utilise an animal model to investigate the neurobiological mechanisms underlying  
39 increased opioid use associated with high anxiety and chronic pain.  
40 Combining a genetic model of negative affect, the Wistar Kyoto (WKY) rat, and intra-  
41 articular injection of monosodium iodoacetate (MIA; 1mg), our model of high anxiety  
42 and augmented OA-like pain behaviour mirrors the clinical problem. Effects of  
43 morphine ( $0.5-6\text{mg}\cdot\text{kg}^{-1}$ ) on pain behaviour and spinal nociceptive neuronal activity  
44 were determined in WKY rats, and normo-anxiety Wistar rats, 3 weeks after MIA  
45 injection. WKY rats developed augmented OA-like pain, and had blunted inhibitory  
46 responses to morphine, when compared to Wistar rats. Potential alterations in  
47 endogenous opioid function were probed via systemic blockade of opioid receptors  
48 with naloxone ( $0.1-1\text{mg}\cdot\text{kg}^{-1}$ ), quantification of circulating levels of  $\beta$ -endorphin, and  
49 determination of spinal expression of the mu-opioid receptor (MOR). These studies  
50 revealed increased opioidergic tone, and increased spinal desensitization of MORs  
51 via the master phosphorylation site at serine residue 375, in this model.  
52 We demonstrate attenuated MOR function in the absence of previous exogenous  
53 opioid ligand exposure in our model of high anxiety and OA-like pain, which may  
54 account for reduced analgesic effect of morphine and provide a potential explanation  
55 for increased opioid analgesic intake in high anxiety chronic pain patients.

56 **Significance Statement** (116)

57 Chronic pain affects large numbers of people, and pain management often relies on  
58 poorly effective opioid analgesics, the iatrogenic effects of which are increasingly  
59 recognised. The endogenous opioid system - the target for exogenous opioid  
60 analgesics - plays key roles in emotional affective states and pain control, but the  
61 complex interplay between anxiety, chronic pain, and endogenous opioid system  
62 function is challenging to study in people. Here, we have addressed this using a  
63 clinically-relevant experimental model. Anxiety-like behaviour was associated with  
64 increased chronic arthritis-like pain behaviour, altered opioid receptor function, and  
65 reduced efficacy of opioid analgesics. We provide new evidence, which may explain  
66 why chronic pain patients with comorbid high anxiety have higher opioid analgesic  
67 use.

## 68 **1. Introduction** (628)

69 Opioid analgesics have formed the backbone of the management of moderate to  
70 severe pain for decades. Opioid drugs, such as morphine, produce their effects via  
71  $\mu$ -opioid receptors (MOR) at key sites in the spinal cord and brain (McMahon, 2013).  
72 Since the 1990s, there has been a shift in the prescribing of opioids from managing  
73 acute pain and pain in terminally ill patients, to more wide-spread prescribing for a  
74 wide range of long-term pain conditions (Curtis et al., 2019).

75 Both morphine's analgesia and its side-effects (tolerance, respiratory depression,  
76 euphoria, and dependence) are mediated by MOR. Clinical studies provide strong  
77 evidence that, although opioids are excellent analgesics for acute pain such as post-  
78 operative pain, long-term use of opioids is not associated with useful pain relief in  
79 most people (Colvin et al., 2019). This loss of analgesic benefit is attributed to MOR  
80 tolerance and the manifestation of opioid-induced hyperalgesia (Yang et al., 2019),  
81 both of which have major implications for pain trajectories *per se*, as well as post-  
82 operative outcomes and a contribution towards poorly-controlled pain (Colvin et al.,  
83 2019). Chronic pain alters endogenous opioid function, including increased release  
84 of endogenous opioid ligands, such as  $\beta$ -endorphin, which may lead to alterations at  
85 MOR with increased phosphorylation, opioid tolerance, and lower analgesic  
86 responsiveness to morphine (Petraschka et al., 2007; Bruehl et al., 2013).

87 Osteoarthritis (OA) is the most common form of arthritis (Glyn-Jones et al., 2015)  
88 and the fastest growing cause of chronic pain worldwide (Vos et al., 2012;  
89 GBD\_2013\_DALYs\_&\_HALE\_Collaborators et al., 2015). OA pain phenotypes  
90 reflect both nociceptive and neuropathic mechanisms of pain (Glyn-Jones et al.,  
91 2015; Perrot, 2015), and approximately 20% of people exhibit features of central

92 sensitization, including regional spread of pain (Suokas et al., 2012; Arendt-Nielsen  
93 et al., 2015). Despite the reportedly high rates of opioid-prescribing for OA pain  
94 (Bedson et al., 2016; Thorlund et al., 2019), opioids have no superior effect over  
95 non-opioid treatments over 12 months (Krebs et al., 2018), and long-term opioid use  
96 is associated with increased risk of adverse events (Bedson et al., 2016). Negative  
97 affect, including anxiety and depression, is associated with exacerbated chronic pain  
98 (de Heer et al., 2014), and is common in people with OA (Axford et al., 2010; Barnett  
99 et al., 2018). Previous studies reported complex relationships between endogenous  
100 opioid function and depressive symptoms and trait anxiety in people (Burns et al.,  
101 2017), and negative affect is associated with greater use of opioid analgesics in  
102 people with OA (Valdes et al., 2015; Barnett et al., 2018; Namba et al., 2018).  
103 Substantial advances in the understanding of the mechanisms of pain and opioid-  
104 induced analgesia have been made using rodent models of disease and molecular  
105 and pharmacological studies of opioid receptor function (Pasternak, 2012, 2014).  
106 Inbred Wistar Kyoto (WKY) rats are used as an experimental model of anxiety-like  
107 behaviour (McAuley et al., 2009). Previously, we reported exacerbated pain  
108 behaviour in the monosodium iodoacetate (MIA) model of OA pain in WKY rats,  
109 including a spread of pain to the contralateral side and increased markers of  
110 astrocytic activation (Burston et al., 2019).  
111 We hypothesised that heightened anxiety is associated with alterations in the  
112 endogenous opioidergic system and MOR function, which may counter the effects of  
113 exogenous morphine used to treat OA pain. Herein, we evaluated the degree of  
114 morphine-mediated analgesia and effects of naloxone-mediated blockade of the  
115 endogenous opioid system in a model of OA-like pain in high anxiety WKY and  
116 normo-anxiety Wistar rats, then investigated the underlying neurobiological

117 mechanisms. Circulating levels of  $\beta$ -endorphin were measured in Wistar and WKY  
118 rats, and potential changes in MOR function in the spinal cord were investigated.  
119 Levels of MOR protein and MOR receptor phosphorylation at serine residue 375,  
120 which is required for morphine-mediated desensitization (Schulz et al., 2004), were  
121 quantified in the dorsal horn of the spinal cord.

122

123

## 124 **2. Materials & Methods**

### 125 **2.1 Experimental Animals**

126 Studies were in accordance with UK Home Office Animals (Scientific Procedures)  
127 Act (1986) and ARRIVE guidelines (Kilkenny et al., 2012). A total of 183 male rats  
128 were used for this study; Wistar  $n = 97$  (Charles River, Margate, United Kingdom), &  
129 Wistar Kyoto  $n = 86$  (WKY; Envigo, Bicester, United Kingdom). Males only were  
130 used to reduce variability in the data, and to maintain consistency with previous  
131 studies characterising this model. Wistar rats were used as the most genetically  
132 similar control strain to WKY. Rats were group housed by strain in groups of 4 on a  
133 12-hour light/dark cycle in a specific pathogen-free environment with *ad libitum*  
134 access to standard rat chow and water. Treatments were randomly assigned to rats,  
135 and experimenters were blinded to all treatment groups throughout the study. A total  
136 of 14 rats were excluded from the study (7.6%; see **Extended Data Table 1-1** for  
137 further details).

138

### 139 **2.2 Induction of the MIA model of OA pain**

140 All rats received a single intra-articular injection into the left knee, through the infra-  
141 patellar ligament using a 29-gauge hypodermic needle, under isoflurane anaesthesia

142 (3% 1Lmin<sup>-1</sup> O<sub>2</sub>). Rats were randomly assigned to receive either 1mg/50µl MIA in  
143 0.9% saline (Wistar *n* = 48, WKY *n* = 45) or 50µl 0.9% saline (Wistar *n* = 41; WKY *n*  
144 = 41). Health and welfare checks were performed immediately after anaesthetic  
145 recovery, then daily for the first 3 days, and weekly thereafter. Pain behaviour was  
146 assessed twice weekly from D3 to 21 post-model induction.

147

### 148 **2.3 Behavioural Testing**

149 All rats were habituated to the pain behaviour testing environment for 2 days prior to  
150 taking baseline measurements to minimise any exploratory behaviour during testing.

151 Baseline measurements were taken in the morning prior to treatment (D0).

152 Weightbearing (WB) asymmetry was assessed using an incapacitance tester (Bove  
153 et al., 2003) (Linton Instrumentation, Diss, UK). Healthy rats distribute their weight  
154 evenly between limbs, and a weight shift onto the contralateral limb indicates pain at  
155 rest in the ipsilateral knee joint (Bove et al., 2003). Referred pain at distal sites was  
156 assessed via determination of mechanical hindpaw withdrawal thresholds (PWTs)  
157 via von Frey hair (vFH) monofilaments using the up/down method for both ipsilateral  
158 and contralateral paws (Chaplan et al., 1994).

159 The elevated plus maze (EPM; Walf and Frye, 2007) was used to measure anxiety in  
160 Wistar and WKY rats. Rats were placed into the centre of the arena with their nose  
161 pointing into an open arm and activity was monitored for a period of 10 minutes  
162 using Ethovision software (Noldus Information Technology, Netherlands). Latency to  
163 enter the open outer arm and total time spent in closed versus open arms was then  
164 determined. Some exploratory behaviour in the open arms of the maze is expected  
165 in normo-anxiety animals, whilst restriction of activity to the closed arms is  
166 considered a surrogate indicator of anxiety-like behaviour.



167 To control for any strain differences in locomotor activity in a non-anxiogenic  
168 environment, the number of beam breaks per hour was assessed in an activity box  
169 (39.5cm x 23.5cm x 24.5cm, 4 x 8 photobeam array; Photobeam Activity System,  
170 San Diego Instruments, USA) in animals of both strains at baseline and 19-21 days  
171 after model induction (Pezze et al., 2014).

172

## 173 **2.4 Pharmacological Interventions**

### 174 **2.4.1 Systemic naloxone/morphine behavioural study:**

175 To assess differences in sensitivity to systemic opioids, and potential alterations in  
176 endogenous opioidergic tone, behavioural responses to cumulative systemic doses  
177 of morphine, naloxone, or vehicle (0.9% saline) were determined in Wistar and WKY  
178 rats 21 days after model induction in separate groups of rats, respectively. Pre-drug  
179 pain behaviour was assessed via WB and vFH in MIA or saline-treated rats, then  
180 following 3 cumulative systemic doses of morphine (0.5, 2, & 3.5 mg.kg<sup>-1</sup>mL<sup>-1</sup>, s.c.;  
181 Wistar/MIA *n* = 10, WKY/MIA *n* = 10) or vehicle (Wistar/saline *n* = 8, WKY/saline *n* =  
182 8), or naloxone (0.1, 0.3, & 1 mg.kg<sup>-1</sup>mL<sup>-1</sup>, s.c.; Wistar/saline *n* = 12, Wistar/MIA *n* =  
183 12, WKY/saline *n* = 10, WKY/MIA *n* = 11). Pain behaviour was assessed at 15, 30,  
184 and 60 mins after each dose.

185

### 186 **2.4.2 In vivo Spinal Electrophysiology**

187 To assess potential differences in spinal sensory network activity and responses to  
188 systemic morphine between strains, in the presence and absence of OA-like pain,  
189 single unit extracellular recordings were obtained from wide dynamic range (WDR)  
190 neurons in the deep dorsal horn, as previously described (Urch and Dickenson,  
191 2003). Briefly, a laminectomy was performed under isoflurane anaesthesia (surgery:

192 3%, maintenance: 1.5%) to expose lumbar L4 6 spinal cord, and a WDR neurone  
193 was located with a receptive field in the toes of the ipsilateral hindpaw via a glass-  
194 coated tungsten microelectrode (Wistar/saline  $n = 10$ , Wistar/MIA  $n = 15$ ;  
195 WKY/saline  $n = 12$ , WKY/MIA  $n = 12$ ). Once identified, WDR neurones were  
196 characterised via electrical stimuli delivered to the receptive field via bipolar  
197 electrodes. WDRs exhibit responses to electrical stimulation at A $\beta$ , A $\delta$ , and C fibre  
198 latencies, and wind up in response to a repeated noxious electrical stimulation (16 x  
199 50ms, 0.5Hz, delivered at 3-fold C fibre threshold). The degree of wind up can be  
200 used as a proxy of central sensitization (D'Mello and Dickenson, 2008). Mechanical  
201 responses to hindpaw stimulation with 8, 10, 15, and 26g vFH (10s application, 10s  
202 inter stimulus interval) were recorded at baseline, and then every 10 mins following  
203 cumulative systemic doses of morphine sulfate (0.5, 2.5, & 6 mg.kg<sup>-1</sup>, s.c., 60 min  
204 intervals).

205

## 206 **2.5 Assessment of Opioid Function in *Ex Vivo* Tissues**

### 207 **2.5.1 Western Blotting**

208 To determine potential differences in spinal opioid receptor expression, fresh spinal  
209 cord tissue was collected from WKY and Wistar rats 21 days after intra-articular  
210 injection of MIA or saline ( $n = 4$ /strain). Rats were killed via overdose with sodium  
211 pentobarbital (Euthatal, 2mL, i.p.), decapitated, and spinal cord tissue rapidly  
212 collected via hydraulic extrusion. The lumbar enlargement of the spinal cord was  
213 then hemisected down the midline, snap-frozen in liquid nitrogen, and stored at -  
214 80°C until processed. Tissue was homogenised in RIPA buffer with added protease  
215 and phosSTOP inhibitor cocktails (Sigma Aldrich, Gillingham, UK) to prevent  
216 degradation of proteins and preserve their phosphorylation sites. An equal amount of

217 protein (150 $\mu$ g) from each sample was then separated via SDS-PAGE, transferred  
218 onto nitrocellulose membranes, and probed for expression of total MOR (rabbit anti-  
219 mu opioid receptor, Neuromics, RA10104, 1:500), P-ser375 MOR (rabbit anti-mu  
220 opioid receptor Ser375, BLOSS-Stratech, bs-3724R, 1:500), and  $\beta$ -actin (mouse anti-  
221  $\beta$ -actin, Sigma, A5441, 1:5000) via overnight incubation in 5% milk at 4°C.  
222 Secondary antibodies were IRDye donkey anti-rabbit 800CW and donkey anti-  
223 mouse 680RD (1:5000 in 5% milk, RT, 1.5hr), and resulting fluorescent signal  
224 imaged via Licor Odyssey system (LI-COR Biosciences, Cambridge, UK) and  
225 resulting bands quantified via densitometry measurements in Image Studio Lite  
226 version 5.2 (LI-COR Biosciences). Data are expressed as expression level relative to  
227  $\beta$ -actin.

228

### 229 **2.5.2 $\beta$ -endorphin ELISA**

230 To determine any strain differences in circulating endogenous opioid peptides, levels  
231 of  $\beta$ -endorphin were measured via a commercial ELISA in blood obtained from naïve  
232 male Wistar ( $n = 8$ ) and WKY ( $n = 7$ ) rats. Rats were humanely killed via overdose of  
233 sodium pentobarbital (Euthatal, 2mL, i.p.) and exsanguinated to generate blood  
234 samples. Whole blood was collected in ice cold tubes containing 200 $\mu$ l heparin and  
235 processed within one hour. Samples were centrifuged at 13,000 rpm, 4°C for 20  
236 mins, and the supernatant plasma collected and stored at -80°C prior to assay.  
237 Plasma samples were assayed for  $\beta$ -endorphin in duplicate using a commercially  
238 available EIA kit (Phoenix Pharmaceuticals, Burlingame, CA, USA) according to the  
239 manufacturer's instructions.

240

## 241 **2.6 Assessment of joint pathology**

242 At the end of each study, rats were euthanised via overdose with sodium  
243 pentobarbital (Euthatal, 2ml, i.p.) and whole knee joints collected and fixed in 10%  
244 neutral buffered formalin (Guingamp et al., 1997). Knee joints were disarticulated,  
245 and cartilage damage quantified by a blinded experimenter via established  
246 macroscopic scoring methods (Guingamp et al., 1997). 7.6% of rats were excluded  
247 from the study due to inconsistent joint pathology (see **Extended Data Table 1-1** for  
248 further details).

249

## 250 **2.7 Experimental design & statistical analyses**

251 **2.7.1 Behavioural Data:** To correct for strain differences in total bodyweight,  
252 weightbearing asymmetry was calculated as the percentage of weight borne on the  
253 ipsilateral hindlimb compared to the total of both hindlimbs [ipsilateral g/(ipsilateral  
254 g+contralateral g)]. Similarly, locomotor activity was assessed as the number of  
255 beam breaks per minute per kilogram bodyweight. Mechanical PWTs are reported as  
256 raw vFH values, or as change in the number of vFHs from baseline when pooling  
257 between different cohorts of animals (see Figure 1). For response to  
258 pharmacological interventions, % analgesia was calculated for both weightbearing  
259 and PWTs. 100% analgesia constitutes total normalisation of weightbearing  
260 asymmetry [ipsilateral g/(ipsilateral g+contralateral g) = 50%] or a normalisation of  
261 PWT to pre-model baseline values. Anxiety-like behaviour was determined for each  
262 animal via Ethovision software as the area under the curve (AUC) of the time spent  
263 in the open arms of the elevated plus maze in 1 minute bins for the entire 10 min  
264 assessment period, and latency to enter the open outer arm in seconds.

265

266 **2.7.2 Spinal electrophysiology:** Degree of wind up was determined from the total  
267 number of spikes recorded in response to each stimuli in a train of 16 delivered at 3  
268 x C-fibre threshold. Responses corresponding to each fibre type were binned  
269 according to post-stimulus latency, and wind up calculated from those falling in the  
270 C-fibre (90-300ms) and post-discharge (300-1000ms) latency range. Responses to  
271 mechanical stimuli were recorded as average firing rate (Hz) in response to 10s  
272 stimulation with each vFH. To determine effects of pharmacological interventions,  
273 mean maximal inhibition (MMI) for each dose was calculated as maximal % change  
274 versus baseline, with peak inhibition occurring 40-60 mins after administration. MMI  
275 data for each dose were then plotted for each strain and treatment, and the AUC  
276 calculated and compared.

277

### 278 **2.7.3 Statistical Analyses**

279 Group sizes were calculated based on previous similar studies using the MIA model  
280 to give sufficient statistical power whilst minimising animal usage. Data were  
281 analysed using Prism 8.3.1 software (GraphPad, La Jolla, USA). Data distributions  
282 were assessed via D'Agostino & Pearson normality testing, and subsequently  
283 treated as parametric or non-parametric, as appropriate. Differences in pain  
284 behaviour data were analysed via two-way ANOVA, with strain and treatment as the  
285 independent variables and Tukey's *post-hoc* test for multiple comparisons. For all  
286 other comparisons one-way ANOVAs with Holm-Sidak multiple comparisons, or  
287 Kruskal-Wallis tests with Dunn's multiple comparison *post-hoc* tests were used to  
288 analyse data with 3 or more groups, whilst Mann-Whitney *U* tests or Wilcoxon signed  
289 rank tests were used for comparisons between strains. Data are stated as mean  $\pm$   
290 SEM, or median with interquartile range (IQR), as appropriate.

291 Full experimental data are available from the authors upon request.

292

### 293 **3. Results**

#### 294 **3.1 WKY rats exhibit a basal anxiety-like phenotype**

295 To confirm the anxiety-like phenotype of WKY rats, behaviour in the anxiogenic  
296 environment of the elevated plus maze (EPM) was assessed in both strains at  
297 baseline. WKY rats spent significantly less time in the open arms when compared to  
298 Wistar rats (Figure 1A, median AUC 17.40, IQR 4.92 – 31.68 versus 33.60, IQR 19.2  
299 – 57.87,  $p=0.003$ ), and had a significantly greater average latency to enter the open  
300 outer arm (600 versus 298, IQR 86-600 seconds,  $p=0.0077$ , Mann-Whitney  $U$  test,  
301 Figure 1B). Collectively, these data confirm that the WKY rats used in this study had  
302 an anxiety-like behavioural phenotype.

303

#### 304 **3.2 WKY rats exhibit exacerbated pain behaviour in the MIA model of OA**

305 WKY and Wistar rats had comparable hindpaw mechanical sensitivity at baseline  
306 and weight was borne equally on both hindpaws (Table 1). Consistent with our  
307 previous work, intra-articular injection of MIA resulted in a significant shift in  
308 weightbearing from the injured side (weightbearing asymmetry) in both strains of rats  
309 from day 3 onwards, which persisted for the duration of the study (Figure 1C). The  
310 degree of asymmetry following injection of MIA was similar in both strains of rats,  
311 although slightly less pronounced in WKY rats. Both strains of rats also exhibited a  
312 lowering of the ipsilateral mechanical hindpaw withdrawal threshold (PWT, Figure  
313 1D) which was evident from day 10. Ipsilateral PWTs were lowered to a greater  
314 extent in the WKY strain when compared to Wistar rats (Table 1; mean change in  
315 vFH from baseline Wistar = -1.68, WKY = -3.22), indicating an exacerbated OA-like

316 pain phenotype, as previously reported (Burston et al., 2019). We also observed a  
317 reduction in contralateral PWTs in WKY rats (**Extended Data Figure 1-1**), which is  
318 consistent with a centralised pain phenotype in this model (Burston et al., 2019).

319

### 320 **3.3 Anxiety-like behaviour and OA-like joint pathology**

321 To determine whether induction of OA-like pain behaviour altered anxiety-like  
322 behaviours, behavioural responses in the EPM were reassessed 19-21 days after  
323 intra-articular injection of saline or MIA. No significant differences were observed  
324 between MIA and saline-injected rats when comparing within strains (Figure 1E),  
325 however an anxiety-like phenotype was present in the WKY strain when compared to  
326 Wistar rats at this time point (Figure 1F, AUC for time spent in open arms 1.50 0.03 –  
327 6.48 versus 20.10 IQR 5.98 – 41.61, \*\*\*\* p<0.0001, one-tailed Mann Whitney U test).  
328 This is in agreement with our previous work demonstrating that presence of OA-like  
329 pain behaviour does not further increase anxiety-like behaviour in either strain  
330 (Burston et al., 2019). Locomotor activity at baseline and at D18-21 was comparable  
331 between the two strains of rats (Figure 1G), demonstrating no differences in  
332 exploratory activity in the absence of an anxiogenic environment.

333 To ensure the marked increase in MIA-induced pain behaviour in the WKY strain  
334 was not due to an alteration in joint pathology, cartilage damage in the injected knee  
335 was assessed via macroscopic scoring. MIA administration was associated with  
336 significant increases in cartilage damage compared to the appropriate saline control,  
337 in both WKY and Wistar rats (Figure 1H). It is noteworthy that, despite the  
338 significantly greater pain behaviour in MIA-treated WKY rats, this strain actually had  
339 slightly less cartilage damage when compared to Wistar rats.

340

341 **3.4 Exacerbated pain behaviour in the WKY/MIA model is associated with**  
342 **enhanced excitability of spinal neurones**

343 To determine whether the altered behavioural phenotype in the MIA model of OA-like  
344 pain behaviour in WKY rats was encoded in the spinal cord dorsal horn, a key site in  
345 neuronal nociceptive circuitry, we then performed *in vivo* single-unit recordings of  
346 spinal WDR neurons in both WKY and Wistar rats 21-27 days after model induction.  
347 No differences were observed in baseline characteristics of recorded neurones  
348 (depth, A $\beta$  and C-fibre latencies and thresholds, see **Extended Data Table 2-1**).  
349 However, wind up, a proxy of central sensitization (Li et al., 1999), did significantly  
350 vary across strains and treatments (Figure 2A). In the absence of a pain state, wind-  
351 up was significantly greater in WKY rats when compared to their Wistar counterparts  
352 ( $p < 0.05$  for stimuli 5 & 6, 2 way ANOVA with Tukey multiple comparisons *post-hoc*  
353 testing), and was further increased 21 days after MIA-treatment in the WKY strain  
354 ( $p < 0.05$ , stimuli 3-6, 2 way ANOVA with Tukey multiple comparisons *post-hoc*  
355 testing). The response to the first stimulus in the train was also notably larger in the  
356 WKY strain (Figure 2A), particularly responses occurring at A $\delta$  and C fibre latencies  
357 in WKY rats (**Extended Data Figure 2-2**). Despite a marked lowering of ipsilateral  
358 PWTs in the MIA model in both strains, there were no differences in the magnitudes  
359 of innocuous and noxious mechanically-evoked responses of WDR neurons between  
360 any of the groups (Figure 2B). Taken together, these data demonstrate enhanced  
361 spinal sensitivity to nociceptive input in the WKY strain, with further enhanced  
362 excitability to overt nociceptive stimuli in the presence of an OA-like pain state.

363

364 **3.4 Reduced effects of systemic morphine in the WKY/MIA model of high**  
365 **anxiety & OA-like pain behaviour**



366 At 21 days following induction of the MIA model of OA pain, subcutaneous (s.c.)  
367 injection of the opioid receptor agonist morphine (0.5, 2.5, & 6 mg.kg<sup>-1</sup> cumulative  
368 dose) produced a significant, dose-related reduction in weightbearing asymmetry in  
369 Wistar rats (Figure 3A). In contrast, only the highest dose of morphine significantly  
370 inhibited weightbearing asymmetry in MIA-treated WKY rats (Figure 3A). Similarly,  
371 morphine had a significantly blunted effect on ipsilateral PWTs in MIA-treated WKY  
372 rats when compared to the Wistar strain (Figure 3B). All three doses of morphine  
373 significantly reversed PWTs in MIA-treated Wistar rats, whereas only the highest  
374 dose of morphine produced a significant reversal in ipsilateral PWTs in WKY rats  
375 (Figure 3B). This highest dose of morphine significantly reversed the lowered  
376 contralateral PWT evident in MIA treated WKY rats (Figure 3C).

377 At the level of the spinal cord, the inhibitory effect of cumulative systemic (s.c.) doses  
378 of morphine on evoked neuronal responses was also significantly blunted in MIA-  
379 treated WKY rats when compared to Wistar rats (Figure 3D-I). Although the mean  
380 maximal inhibitory (MMI) effect of the lowest dose (0.5 mg.kg<sup>-1</sup>) was similar across  
381 the range of noxious and non-noxious mechanical stimuli studied, there was little  
382 additional inhibition following successive increased doses of morphine in the WKY  
383 MIA rats. This was particularly evident with the lower force filaments (8 & 10g, Figure  
384 3D-E, & G-H). These data provide further evidence of reduced inhibitory effects of  
385 systemic morphine in rats with an anxiety-like phenotype and OA-like pain.

386

### 387 **3.5 Evidence for altered endogenous opioid signalling in WKY rats**

388 We hypothesised that the reduced inhibitory effects of morphine on pain behaviour  
389 and spinal neuronal responses in WKY rats may arise as a result of changes in  
390 opioid receptor function and circulating levels of endogenous opioids. To test this,

391 plasma levels of  $\beta$ -endorphin were measured by ELISA. Significantly higher levels of  
392  $\beta$ -endorphin were detected in WKY rats when compared to Wistar rats (Figure 4A).  
393 We then focused on MOR expression at the level of the dorsal horn of the spinal  
394 cord. Western blotting revealed no significant differences in total spinal MOR  
395 expression in any group (Figure 4B&C). There was, however, an increase in the  
396 proportion of MOR phosphorylated at the master phosphorylation site (serine residue  
397 375; P-ser375) in the dorsal horn of the spinal cord in MIA-treated WKY rats, when  
398 compared to saline-treated WKY rats (Figure 4D,  $p = 0.0143$ ). By contrast, the  
399 proportion of phosphorylation at P-ser375 in the dorsal horn of the spinal cord was  
400 not altered in MIA-treated Wistar rats compared to saline-treated Wistar rats, and  
401 levels were comparable in the saline-treated WKY rats.

402 As our data so far point towards altered opioidergic function in WKY rats, the effects  
403 of blocking the  $\mu$ -opioid receptor with the antagonist naloxone on pain behaviour  
404 were assessed in the MIA model in both strains of rats (Figure 5). Naloxone (0.1-1  
405  $\text{mg.kg}^{-1}$  s.c.) did not alter PWTs in Wistar rats 21 days after intra-articular injection of  
406 saline, suggesting no overt basal endogenous opioidergic tone in these rats.

407 However, all three doses of naloxone (0.1-1  $\text{mg.kg}^{-1}$ ) significantly lowered ipsilateral  
408 PWTs in MIA-treated Wistar rats, supporting the presence of endogenous opioid  
409 tone following induction of the model of OA pain in this strain of rats. In WKY rats,  
410 systemic naloxone (0.1-1  $\text{mg.kg}^{-1}$ ) produced a significant bilateral lowering of PWTs  
411 (Figure 5A-D) which was similar in both saline- and MIA-treated WKY rats. These  
412 data further support the presence of an elevated endogenous opioid tone in WKY  
413 rats in the absence of the pain model, consistent with the increased levels of  $\beta$ -  
414 endorphin demonstrated herein. The endogenous opioid tone did not appear to be  
415 further increased in the presence of the model of OA pain.

416

417 **Discussion** (1138)

418 Clinically, people with high anxiety and chronic pain, including OA pain, have greater  
419 opioid consumption compared to people with comparable pain but less anxiety  
420 (Barnett et al., 2018). Here, we demonstrate reduced morphine-mediated analgesia  
421 in a rodent model of heightened anxiety and OA-like pain, providing an experimental  
422 model to further investigate the underlying neurobiological mechanisms.  
423 Systemically-administered morphine produced a robust inhibition of behavioural pain  
424 responses following OA-induced joint pathology in Wistar rats. However, in WKY rats  
425 with a heightened anxiety-like phenotype, the effects of morphine on OA-induced  
426 pain behaviour were significantly blunted. In particular, the lowest dose of morphine  
427 significantly reversed weightbearing asymmetry and hindpaw withdrawal thresholds  
428 in OA-treated Wistar, but not WKY, rats. Since the highest dose of systemic  
429 morphine produced comparable inhibitory effects on MIA-induced pain behaviour in  
430 both strains of rats, it is likely that this results from reduced efficacy of opioid  
431 signalling in WKY rats. Reduced efficacy of morphine was previously reported in  
432 acute pain tests in WKY rats (Hestehave et al., 2019). We provide the first evidence  
433 of blunted opioid analgesia in a clinically-relevant model of chronic OA pain in this  
434 genetic strain of rats, providing a platform to interrogate the underlying neurobiology.  
435 Our experimental data are consistent with clinical evidence that anxiety in people  
436 with joint pain is associated with the greater use of prescription opioids (Barnett et  
437 al., 2018), and prolonged use of opioids following total joint replacement for  
438 persistent joint pain (Namba et al., 2018). Catastrophizing has also been associated  
439 with increased prescription opioid use 4 years following total joint replacement  
440 (Valdes et al., 2015). Interestingly, recent work reported that the relationship

441 between anxiety and prescription opioid use for chronic pain is stronger in males  
442 than females (Rogers et al., 2020), supporting our strategy of using male rats for this  
443 preclinical experimental model system.

444 Electrophysiological recordings of spinal cord dorsal horn WDR neurones in OA-  
445 treated WKY rats compared to OA-treated Wistar rats also revealed subtle changes  
446 in MOR function. Specifically, the effects of systemic morphine on WDR responses  
447 to low- and high-force mechanical stimulation of the hindpaw were blunted in WKY  
448 OA-treated rats, supporting the notion that MOR function is altered in these animals.  
449 Clearly, these changes in morphine responsiveness may reflect alterations in MOR  
450 function at multiple levels of the neuraxis. We hypothesised that these blunted  
451 inhibitory effects of exogenous morphine may arise due to a loss or desensitization  
452 of MOR.

453 The C-terminus of MOR has a number of phosphorylation sites that contribute to  
454 receptor desensitization and internalisation. Of the residues that undergo agonist-  
455 dependent phosphorylation, residues 375 to 379 (STANT) have a critical role in  
456 endogenous opioid-induced acute desensitization, recovery from desensitisation,  
457 and internalisation of MOR (Arttamangkul et al., 2019; Kliewer et al., 2019). In our  
458 study, phosphorylation of the serine-375 residue of MOR was significantly elevated  
459 in the ipsilateral dorsal horn of the spinal cord of OA-treated WKY rats. These data  
460 suggest that MOR tolerance in the dorsal horn spinal cord may account, at least in  
461 part, for the loss of analgesic effect of morphine in these rats. However, the spinal  
462 cord is unlikely to be the only site and changes in MOR expression and/or  
463 phosphorylation at other sites in the brain may also contribute.

464 Previous studies have reported complex relationships between endogenous opioid  
465 function, depressive symptoms, and trait anxiety in people (Burns et al., 2017). In our

466 study, a small, but significant, elevation in plasma  $\beta$ -endorphin was detected in WKY  
467 rats. This finding, alongside the demonstration of a reduced analgesic effect of  
468 systemic morphine in the model of OA pain, is consistent with the clinical evidence  
469 that greater endogenous opioid function is associated with lower morphine analgesic  
470 responsiveness (Bruehl et al., 2013). A limitation of our study is that plasma levels of  
471  $\beta$ -endorphin were not measured in MIA-treated WKY rats with OA-like pain, nor were  
472 levels of other endogenous opioids determined. Nevertheless, based on previous  
473 studies of the MIA model in mice (Aman et al., 2019), we predict that  $\beta$ -endorphin  
474 levels are likely further elevated in the model of OA pain.

475 Functional evidence for changes in endogenous opioid tone in WKY rats was  
476 provided by our demonstration that systemic naloxone lowered hindpaw withdrawal  
477 thresholds in Wistar rats in the presence of the model of OA pain, but not in pain free  
478 saline-treated Wistar rats. These data are consistent with the engagement of the  
479 endogenous opioidergic systems in models of chronic pain previously demonstrated  
480 in clinical pain states (Levine et al., 1978; Kayser and Guilbaud, 1990; reviewed in  
481 Fields, 2004). Under these conditions, the endogenous opioidergic systems acts to  
482 counter the increased pro-nociceptive signalling and the manifestation of pain  
483 behaviour and experience. In the WKY strain, naloxone significantly lowered  
484 hindpaw withdrawal thresholds in the absence of the model of OA pain, consistent  
485 with the elevated levels of plasma  $\beta$ -endorphin in WKY rats demonstrated herein.

486 The presence of the model of OA pain in WKY rats did not further increase the effect  
487 of naloxone on hindpaw withdrawal thresholds, suggesting that the presence of the  
488 model of OA pain could not further engage the endogenous opioidergic system in the  
489 WKY rats, as it did in the Wistar rats. This loss of chronic pain-induced engagement  
490 of the opioidergic inhibitory pathways, alongside our evidence for increased

491 phosphorylation of serine-375 of MOR in WKY MIA treated rats, may account for the  
492 reduced effectiveness of the lower doses of morphine in WKY MIA treated rats.  
493 A consideration of this work is the use of an inbred rat strain to model anxiety-like  
494 behaviour, and whether this may confound our findings. Differences in MOR gene  
495 expression between WKY and Sprague Dawley rats have been reported for some  
496 brain regions (Burke et al., 2019). Although no differences in expression were  
497 observed in the reward-associated nucleus accumbens (Dennis et al., 2016), and the  
498 report of reduced acquisition of morphine-induced conditioned place preference in  
499 WKY rats, supports our evidence for dysfunctional responses to exogenous opioids  
500 in this strain. Alongside altered opioid function, WKY rats have lower basal levels of  
501 limbic serotonin and dopamine, resulting in a blunted serotonergic and noradrenergic  
502 response to acute stress (De La Garza and Mahoney, 2004; Yamada et al., 2013)  
503 which may be relevant to the clinical situation. Given the key roles for supraspinal  
504 monoamines in descending modulation of pain signalling (Bannister and Dickenson,  
505 2016), it is likely that both opioidergic and monaminergic dysfunction contribute to  
506 augmented OA- like pain responses in WKY rats.  
507  
508 Our study highlights the functional significance of the combination of anxiety, chronic  
509 pain, and elevated opioidergic tone, which leads not only to increased pain  
510 behaviour, but also decreased efficacy of opioid analgesia. Broader implications of  
511 our work include caution in the prescription of opioids to manage chronic pain in OA  
512 patients with comorbid high anxiety.

513 **References**

- 514 Aman Y, Pitcher T, Ballard C, Malcangio M (2019) Impaired chronic pain-like  
515 behaviour and altered opioidergic system in the TASTPM mouse model of  
516 Alzheimer's disease. *Eur J Pain* 23:91-106.
- 517 Arendt-Nielsen L, Skou ST, Nielsen TA, Petersen KK (2015) Altered Central  
518 Sensitization and Pain Modulation in the CNS in Chronic Joint Pain. *Curr Osteoporos*  
519 *Rep* 13:225-234.
- 520 Arttamangkul S, Leff ER, Koita O, Birdsong WT, Williams JT (2019) Separation of  
521 Acute Desensitization and Long-Term Tolerance of micro-Opioid Receptors Is  
522 Determined by the Degree of C-Terminal Phosphorylation. *Mol Pharmacol* 96:505-  
523 514.
- 524 Axford J, Butt A, Heron C, Hammond J, Morgan J, Alavi A, Bolton J, Bland M (2010)  
525 Prevalence of anxiety and depression in osteoarthritis: use of the Hospital Anxiety  
526 and Depression Scale as a screening tool. *Clin Rheumatol* 29:1277-1283.
- 527 Bannister K, Dickenson AH (2016) What do monoamines do in pain modulation?  
528 *Current Opinion in Supportive and Palliative Care* 10:143-148.
- 529 Barnett LA, Pritchard MG, Edwards JJ, Afolabi EK, Jordan KP, Healey EL, Finney  
530 AG, Chew-Graham CA, Mallen CD, Dziedzic KS (2018) Relationship of anxiety with  
531 joint pain and its management: A population survey. *Musculoskeletal Care* 16:353-  
532 362.
- 533 Bedson J, Chen Y, Hayward RA, Ashworth J, Walters K, Dunn KM, Jordan KP  
534 (2016) Trends in long-term opioid prescribing in primary care patients with  
535 musculoskeletal conditions: an observational database study. *Pain* 157:1525-1531.
- 536 Bove SE, Calcaterra SL, Brooker RM, Huber CM, Guzman RE, Juneau PL, Schrier  
537 DJ, Kilgore KS (2003) Weight bearing as a measure of disease progression and

538 efficacy of anti-inflammatory compounds in a model of monosodium iodoacetate-  
539 induced osteoarthritis. *Osteoarthritis Cartilage* 11:821-830.

540 Bruehl S, Burns JW, Gupta R, Buvanendran A, Chont M, Kinner E, Schuster E,  
541 Passik S, France CR (2013) Endogenous opioid function mediates the association  
542 between laboratory-evoked pain sensitivity and morphine analgesic responses. *Pain*  
543 154:1856-1864.

544 Burke NN, Ferdousi M, Deaver DR, Finn DP, Roche M, Kelly JP (2019) Locomotor  
545 and anti-immobility effects of buprenorphine in combination with the opioid receptor  
546 modulator samidorphan in rats. *Neuropharmacology* 146:327-336.

547 Burns JW, Bruehl S, France CR, Schuster E, Orlowska D, Buvanendran A, Chont M,  
548 Gupta RK (2017) Psychosocial factors predict opioid analgesia through endogenous  
549 opioid function. *Pain* 158:391-399.

550 Burston JJ, Valdes AM, Woodhams SG, Mapp PI, Stocks J, Watson DJG, Gowler  
551 PRW, Xu L, Sagar DR, Fernandes G, Frowd N, Marshall L, Zhang W, Doherty M,  
552 Walsh DA, Chapman V (2019) The impact of anxiety on chronic musculoskeletal  
553 pain and the role of astrocyte activation. *Pain* 160:658-669.

554 Chaplan SR, Bach FW, Pogrel JW, Chung JM, Yaksh TL (1994) Quantitative  
555 assessment of tactile allodynia in the rat paw. *J Neurosci Methods* 53:55-63.

556 Colvin LA, Bull F, Hales TG (2019) Perioperative opioid analgesia-when is enough  
557 too much? A review of opioid-induced tolerance and hyperalgesia. *Lancet* 393:1558-  
558 1568.

559 Curtis HJ, Croker R, Walker AJ, Richards GC, Quinlan J, Goldacre B (2019) Opioid  
560 prescribing trends and geographical variation in England, 1998-2018: a retrospective  
561 database study. *The Lancet Psychiatry* 6:140-150.



562 D'Mello R, Dickenson AH (2008) Spinal cord mechanisms of pain. *Br J Anaesth*  
563 101:8-16.

564 de Heer EW, Gerrits MM, Beekman AT, Dekker J, van Marwijk HW, de Waal MW,  
565 Spinhoven P, Penninx BW, van der Feltz-Cornelis CM (2014) The association of  
566 depression and anxiety with pain: a study from NESDA. *PLoS One* 9:e106907.

567 De La Garza R, Mahoney JJ (2004) A distinct neurochemical profile in WKY rats at  
568 baseline and in response to acute stress: implications for animal models of anxiety  
569 and depression. *Brain Research* 1021:209-218.

570 Dennis TS, Beck KD, Cominski TP, Bobzean SAM, Kuzhikandathil EV, Servatius RJ,  
571 Perrotti LI (2016) Exposure to morphine-associated cues increases mu opioid  
572 receptor mRNA expression in the nucleus accumbens of Wistar Kyoto rats.  
573 *Behavioural Brain Research* 313:208-213.

574 Fields H (2004) State-dependent opioid control of pain. *Nat Rev Neurosci* 5:565-575.

575 GBD\_2013\_DALYs\_&\_HALE\_Collaborators et al. (2015) Global, regional, and  
576 national disability-adjusted life years (DALYs) for 306 diseases and injuries and  
577 healthy life expectancy (HALE) for 188 countries, 1990-2013: quantifying the  
578 epidemiological transition. *Lancet* 386:2145-2191.

579 Glyn-Jones S, Palmer AJ, Agricola R, Price AJ, Vincent TL, Weinans H, Carr AJ  
580 (2015) Osteoarthritis. *Lancet* 386:376-387.

581 Guingamp C, Gegout-Pottie P, Philippe L, Terlain B, Netter P, Gillet P (1997) Mono-  
582 iodoacetate-induced experimental osteoarthritis: a dose-response study of loss of  
583 mobility, morphology, and biochemistry. *Arthritis Rheum* 40:1670-1679.

584 Hestehave S, Abelson KSP, Brønnum Pedersen T, Munro G (2019) The analgesic  
585 efficacy of morphine varies with rat strain and experimental pain model: implications

586 for target validation efforts in pain drug discovery. *European Journal of Pain* 23:539-  
587 554.

588 Kayser V, Guilbaud G (1990) Differential effects of various doses of morphine and  
589 naloxone on two nociceptive test thresholds in arthritic and normal rats. *Pain* 41:353-  
590 363.

591 Kilkenny C, Browne WJ, Cuthi I, Emerson M, Altman DG (2012) Improving  
592 bioscience research reporting: the ARRIVE guidelines for reporting animal research.  
593 *Vet Clin Pathol* 41:27-31.

594 Kliewer A, Schmiedel F, Sianati S, Bailey A, Bateman JT, Levitt ES, Williams JT,  
595 Christie MJ, Schulz S (2019) Phosphorylation-deficient G-protein-biased mu-opioid  
596 receptors improve analgesia and diminish tolerance but worsen opioid side effects.  
597 *Nat Commun* 10:367.

598 Krebs EE, Gravely A, Nugent S, Jensen AC, DeRonne B, Goldsmith ES, Kroenke K,  
599 Bair MJ, Noorbaloochi S (2018) Effect of Opioid vs Nonopioid Medications on Pain-  
600 Related Function in Patients With Chronic Back Pain or Hip or Knee Osteoarthritis  
601 Pain: The SPACE Randomized Clinical Trial. *JAMA* 319:872-882.

602 Levine JD, Gordon NC, Jones RT, Fields HL (1978) The narcotic antagonist  
603 naloxone enhances clinical pain. *Nature* 272:826-827.

604 Li J, Simone DA, Larson AA (1999) Windup leads to characteristics of central  
605 sensitization. *PAIN* 79:75-82.

606 McAuley JD, Stewart AL, Webber ES, Cromwell HC, Servatius RJ, Pang KCH (2009)  
607 Wistar-Kyoto rats as an animal model of anxiety vulnerability: support for a  
608 hypervigilance hypothesis. *Behavioural brain research* 204:162-168.

609 McMahon SB (2013) Wall and Melzack's textbook of pain, 6th Edition. Philadelphia,  
610 PA: Elsevier/Saunders.

611 Namba RS, Singh A, Paxton EW, Inacio MCS (2018) Patient Factors Associated  
612 With Prolonged Postoperative Opioid Use After Total Knee Arthroplasty. J  
613 Arthroplasty 33:2449-2454.

614 Pasternak GW (2012) Preclinical pharmacology and opioid combinations. Pain  
615 medicine (Malden, Mass) 13 Suppl 1:S4-S11.

616 Pasternak GW (2014) Opiate pharmacology and relief of pain. Journal of clinical  
617 oncology : official journal of the American Society of Clinical Oncology 32:1655-  
618 1661.

619 Perrot S (2015) Osteoarthritis pain. Best Pract Res Clin Rheumatol 29:90-97.

620 Petraschka M, Li S, Gilbert TL, Westenbroek RE, Bruchas MR, Schreiber S, Lowe J,  
621 Low MJ, Pintar JE, Chavkin C (2007) The absence of endogenous  $\beta$ -endorphin  
622 selectively blocks phosphorylation and desensitization of mu opioid receptors  
623 following partial sciatic nerve ligation. Neuroscience 146:1795-1807.

624 Pezze M, McGarrity S, Mason R, Fone KC, Bast T (2014) Too Little and Too Much:  
625 Hypoactivation and Disinhibition of Medial Prefrontal Cortex Cause Attentional  
626 Deficits. The Journal of Neuroscience 34:7931-7946.

627 Rogers AH, Manning K, Garey L, Smit T, Zvolensky MJ (2020) Sex differences in the  
628 relationship between anxiety sensitivity and opioid misuse among adults with chronic  
629 pain. Addict Behav 102:106156.

630 Schulz S, Mayer D, Pfeiffer M, Stumm R, Koch T, Höllt V (2004) Morphine induces  
631 terminal  $\mu$ -opioid receptor desensitization by sustained phosphorylation of serine-  
632 375. The EMBO Journal 23:3282-3289.

633 Suokas AK, Walsh DA, McWilliams DF, Condon L, Moreton B, Wylde V, Arendt-  
634 Nielsen L, Zhang W (2012) Quantitative sensory testing in painful osteoarthritis: a  
635 systematic review and meta-analysis. Osteoarthritis Cartilage 20:1075-1085.

636 Thorlund JB, Turkiewicz A, Prieto-Alhambra D, Englund M (2019) Opioid use in knee  
637 or hip osteoarthritis: a region-wide population-based cohort study. *Osteoarthritis*  
638 *Cartilage* 27:871-877.

639 Urch CE, Dickenson AH (2003) In vivo single unit extracellular recordings from spinal  
640 cord neurones of rats. *Brain Res Brain Res Protoc* 12:26-34.

641 Valdes AM, Warner SC, Harvey HL, Fernandes GS, Doherty S, Jenkins W, Wheeler  
642 M, Doherty M (2015) Use of prescription analgesic medication and pain  
643 catastrophizing after total joint replacement surgery. *Semin Arthritis Rheum* 45:150-  
644 155.

645 Vos T et al. (2012) Years lived with disability (YLDs) for 1160 sequelae of 289  
646 diseases and injuries 1990-2010: a systematic analysis for the Global Burden of  
647 Disease Study 2010. *Lancet* 380:2163-2196.

648 Walf AA, Frye CA (2007) The use of the elevated plus maze as an assay of anxiety-  
649 related behavior in rodents. *Nat Protocols* 2:322-328.

650 Yamada M, Kawahara Y, Kaneko F, Kishikawa Y, Sotogaku N, Poppinga WJ,  
651 Folgering JHA, Dremencov E, Kawahara H, Nishi A (2013) Upregulation of the  
652 dorsal raphe nucleus-prefrontal cortex serotonin system by chronic treatment with  
653 escitalopram in hyposerotonergic Wistar-Kyoto rats. *Neuropharmacology* 72:169-  
654 178.

655 Yang DZ, Sin B, Beckhusen J, Xia D, Khaimova R, Iliev I (2019) Opioid-Induced  
656 Hyperalgesia in the Nonsurgical Setting: A Systematic Review. *American journal of*  
657 *therapeutics* 26:e397-e405.

658

659

660 **Figure Legends**

661 **Table 1 – Summary of animal numbers and behavioural data**

662 Data from all 3 cohorts of animals utilised in this study (M = morphine study, N =  
663 naloxone study, E = electrophysiology study). Data are expressed as mean  $\pm$  SD, or  
664 median (IQR). Significance assessed via 2 way ANOVA with Tukey multiple  
665 comparison *post-hoc* testing, Kruskal-Wallis test with Dunn's multiple comparison  
666 *post-hoc* testing, or Mann-Whitney *U* tests as appropriate.

667  $\wedge$   $p < 0.01$ ,  $\wedge\wedge\wedge$   $p < 0.0001$  versus Wistar/saline & Wistar/MIA

668 #  $p < 0.05$ , #####  $p < 0.0001$  versus Wistar/saline

669 \*  $p < 0.05$ , \*\*\*\*  $p < 0.0001$  versus WKY/saline

670 +  $p < 0.05$ , ++  $p < 0.01$ , +++  $p < 0.001$ , +++++  $p < 0.0001$  versus Wistar/MIA.

671

672 **Figure 1 – Anxiety-like phenotype & exacerbated OA-like pain in the WKY-MIA**  
673 **model**

674 Basal anxiety-like phenotype in WKY rats in the elevated plus maze (EPM). WKY  
675 rats spent significantly less time in the open arms of the maze (**A**), and showed an  
676 increased latency to enter the most anxiogenic area of the arena; the open outer  
677 arms (**B**). Bars indicate median values, error bars represent IQR. \*\*  $p < 0.01$  versus  
678 Wistar rats, one-tailed Mann-Whitney *U* test.

679 MIA-treated rats had a similar degree of weight-bearing asymmetry in both the  
680 Wistar and WKY strains (**C**), with pain behaviour evident from day 3 onwards and  
681 maintained until post-injection day 21 (D21). Saline administration did not effect  
682 weightbearing in either strain. Data are mean  $\pm$  SEM % weight borne on the

683 ipsilateral hindlimb, #####  $p < 0.001$  versus Wistar saline, \*\*\*\*  $p < 0.0001$  versus WKY  
684 saline, 2 way ANOVA with Tukey mutiple comparison *post-hoc* testing.

685 MIA-treated rats had lowered ipsilateral PWT in both strains, though this occurred  
686 earlier and to a greater extent in WKY rats when compared to Wistar rats (**D**). Data  
687 are mean  $\pm$  SEM change in vFH compared to baseline, \*  $p < 0.05$ , \*\*  $p < 0.01$ , versus  
688 WKY saline, #  $p < 0.05$ , ##  $p < 0.01$  versus Wistar saline, +  $p < 0.05$ , versus Wistar MIA,  
689 2 way ANOVA with Tukey multiple comparison *post-hoc* testing.

690 Measurement of anxiety-like behaviour in the EPM at D21 after model induction  
691 revealed no significant differences between MIA- and saline-injected rats for the two  
692 strains (**E**), but there remained a significant anxiety-like phenotype in the WKY strain  
693 when compared to the Wistar strain (**F**). Data represent AUC of time spent in the  
694 open arm for each minute of the 10 min trial, individual data points are shown with  
695 bars indicating the median value for each group, and error bars representing the  
696 IQR. ##  $p < 0.01$  versus Wistar saline, Kruskal-Wallis test with Dunn's multiple  
697 comparison *post-hoc* test, ++++  $p < 0.001$  versus Wistar rats, one-tailed Mann-  
698 Whitney *U* test.

699 To ensure any behavioural differences observed in the EPM did not result from strain  
700 differences in locomotion, locomotor activity was assessed over a 1 hour period at  
701 baseline, and 18-21 days after model induction (**G**). No significant differences  
702 between strains were observed at either time point. Data are expressed as mean  $\pm$   
703 SEM beam breaks per hour, adjusted for bodyweight.

704 Macroscopic assessment of cartilage damage in ipsilateral knee joints revealed  
705 extensive widespread cartilage damage in MIA-injected rats of both strains, with little  
706 or no damage observed in saline-injected animals (**H**). Data represent the summed

707 scores for each of the 5 individual joint compartments (0-5, max score 25), individual  
708 data points are shown, with bars representing the median value and error bars the  
709 IQR. #####  $p < 0.001$  versus Wistar saline, \*\*\*\*  $p < 0.001$  versus WKY saline.

710

711 **Figure 2 - Enhanced spinal excitability and nociceptive responses in the WKY-**  
712 **MIA model**

713 *In vivo* electrophysiological recordings of WDR neurons in the deep DH revealed  
714 enhanced wind up in the WKY strain in response to noxious electrical stimulation at  
715 3 x C-fibre threshold (**A**). The number of action potentials recorded in the 90-1000ms  
716 post-stimulus (C-fibre to post-discharge latency range) was significantly higher in  
717 saline-injected WKY rats (stimuli 5 & 6) and MIA-injected WKY rats (stimuli 3-6)  
718 when compared to their Wistar counterparts. Data represent mean  $\pm$  SEM number of  
719 action potentials. \*  $p < 0.05$  versus WKY saline, +  $p < 0.05$  versus Wistar MIA, 2 way  
720 ANOVA with Tukey multiple comparisons *post-hoc* testing.

721 There were no significant differences in the frequency of WDR firing recorded in  
722 response to mechanical stimulation across a range of vFHs between strains or  
723 treatments (**B**). Data represent the frequency of firing in response to a 10s stimulus  
724 with each vFH. Values are means  $\pm$  SEM.

725

726 **Figure 3 - Reduced behavioural & spinal response to systemic morphine in the**  
727 **WKY/MIA model of high anxiety & OA-like pain**

728 Systemic administration of morphine produced dose-related inhibitions in the MIA  
729 model in Wistar rats. By contrast, inhibitory effects of the low dose of morphine were

730 significantly attenuated in the WKY strain for weightbearing asymmetry (**A**) and  
731 ipsilateral PWTs (**B**). Morphine did not significantly alter contralateral PWTs in MIA-  
732 treated Wistar rats. However, 6 mg.kg<sup>-1</sup> morphine reversed lowered contralateral  
733 PWTs in MIA-treated WKY rats (**C**). Data represent % analgesia to 3 cumulative  
734 doses of systemic morphine, with abolition of weightbearing asymmetry representing  
735 100% analgesia in **A**, and a return to PWTs to pre-model basal values representing  
736 100% analgesia in **B & C**. \* p<0.05, \*\* P<0.01, \*\*\*p<0.001, \*\*\*\*p<0.0001, Wilcoxon  
737 Signed Ranks test with a hypothetical value of 100.

738 Effects of systemic morphine on mechanically-evoked responses of spinal WDR  
739 neurones was also blunted in MIA treated WKY rats. There was a blunted effect of  
740 cumulative doses of 2.5 and and 6 mg.kg<sup>-1</sup> morphine on 8g- (**D**), 10g- (**E**), and 26g-  
741 evoked (**F**) vFH evoked responses of WDR neurones in MIA-treated WKY rats,  
742 which was confirmed by AUC analysis (**G-I**). Data represent median ± IQR, \* p<0.05,  
743 \*\* p<0.01 Mann-Whitney *U* tests.

744

#### 745 **Figure 4 - Altered endogenous opioid function in the WKY/MIA model**

746 Assessment of circulating plasma levels of β-endorphin in terminal blood samples  
747 from naïve Wistar (*n* = 7) and WKY (*n* = 8) rats revealed a 20% increase in the WKY  
748 strain (**A**). Bars represent the median value, error bars indicate IQR. \* *p* = 0.0361,  
749 one-tailed Mann-Whitney *U* test.

750 Western blotting depicting expresssion of total MOR, and MOR phosphorylated at  
751 the master phosphorylation site (P-ser375) in whole lumbar spinal cord  
752 homogenates (**B**). Densitometry quantification revealed no change in total MOR  
753 levels (**C**) across strains and treatments (*n* = 4/group), and no significant change in



754 phosphorylation in MIA-treated Wistar rats (**D**). However, a significant increase in the  
755 proportion of P-ser375-MOR was evident in MIA-treated WKY rats when compared  
756 to saline-treated controls. Lines at median values, error bars represent IQR, \*  $p =$   
757 0.0143, one-tailed Mann-Whitney  $U$  test.

758

759 **Figure 5 - Altered endogenous opioid tone in rats with an anxiety-like**  
760 **phenotype**

761 Systemic administration of the MOR antagonist naloxone ( $0.1-1 \text{ mg.kg}^{-1}$ , s.c.)  
762 significantly reduced ipsilateral PWTs in MIA-treated, but not saline-treated, Wistar  
763 rats (**A**), suggesting elevated opioidergic tone in the model of OA-like pain. In WKY  
764 rats, naloxone produced a significant, dose-dependent, and bilateral reduction in  
765 PWTs in both saline- and MIA-treated WKY rats (**A&B**), suggesting a more  
766 generalised elevation of opioidergic tone in this strain. Data represent mean  $\pm$  SEM  
767 for baseline PWTs, and MMI values for each cumulative dose of naloxone. #  $p < 0.05$ ,  
768 ##  $p < 0.01$ , ###  $p < 0.001$ , ####  $p < 0.0001$  versus Wistar saline; \* $p < 0.05$ , \*\*\*\*  
769  $p < 0.0001$  versus WKY saline; +  $p < 0.05$ , ++ $p < 0.01$ , +++  $p < 0.001$ , ++++  $p < 0.0001$   
770 versus Wistar MIA, 2 way ANOVA with Tukey multiple comparison *post-hoc* testing.  
771 AUC analysis of dose response curves revealed a significantly greater effect of  
772 naloxone on ipsilateral (**C**) and contralateral (**D**) PWTs in WKY rats when compared  
773 to Wistar rats. Individual data points are shown with bars representing median values  
774 and error bars depicting IQR. ##  $p < 0.01$ , ###  $p < 0.001$  versus Wistar saline;  
775 ++ $p < 0.01$  versus Wistar/MIA, Kruskal-Wallis test with Dunn's multiple comparison  
776 *post-hoc* testing.

|                                                   | <u>Wistar/Saline</u> | <u>Wistar/MIA</u>  | <u>WKY/Saline</u>            | <u>WKY/MIA</u>                  |
|---------------------------------------------------|----------------------|--------------------|------------------------------|---------------------------------|
| <b>Total No.</b>                                  | <b>41</b>            | <b>48</b>          | <b>41</b>                    | <b>45</b>                       |
| Cohort 1 (M)                                      | 8                    | 10                 | 8                            | 10                              |
| Cohort 2 (N)                                      | 12                   | 12                 | 10                           | 11                              |
| Cohort 3 (E)                                      | 17                   | 22                 | 19                           | 20                              |
| <b><u>Bodyweight (Cohort 3, g, mean ± SD)</u></b> |                      |                    |                              |                                 |
| <b>Basal</b>                                      | <b>183±15</b>        | <b>184±14</b>      | <b>157±14 <sup>^^^</sup></b> | <b>160±16 <sup>^^^</sup></b>    |
| <b>Day 21</b>                                     | <b>340±23</b>        | <b>337±28</b>      | <b>251±15 <sup>^^^</sup></b> | <b>247±12 <sup>^^^</sup></b>    |
| <b><u>Pain</u></b>                                |                      |                    |                              |                                 |
| <b>Basal WB %</b>                                 | <b>50.16</b>         | <b>49.75</b>       | <b>50.42</b>                 | <b>50.13</b>                    |
| Cohort 1 (M)                                      | 49.69                | 49.67              | 50.74                        | 50.54                           |
| Cohort 2 (N)                                      | 50.39                | 48.74              | 50.94                        | 50.04                           |
| Cohort 3 (E)                                      | 50.23                | 50.37              | 49.98                        | 49.95                           |
| <b><u>Day21 WB %</u></b>                          |                      |                    |                              |                                 |
| <b>Day21 WB %</b>                                 | <b>48.89</b>         | <b>36.84 #####</b> | <b>50.11</b>                 | <b>43.12 <sup>****, +</sup></b> |
| Cohort 1 (M)                                      | 50.08                | 38.99              | 50.99                        | 43.97                           |
| Cohort 2 (N)                                      | 48.36                | 38.24              | 49.59                        | 44.71                           |
| Cohort 3 (E)                                      | 48.64                | 34.90              | 49.96                        | 41.85                           |
| <b><u>Basal ipsilateral PWT (g)</u></b>           |                      |                    |                              |                                 |
| <b>Basal ipsilateral PWT (g)</b>                  | <b>22.12±5.35</b>    | <b>23.35±5.21</b>  | <b>20.39±6.42</b>            | <b>19.78±6.12</b>               |
| Cohort 1 (M)                                      | 21.88±5.69           | 23.30±5.81         | 19.13±5.69                   | 18.90±6.30                      |
| Cohort 2 (N)                                      | 23.00±5.14           | 26.00±0            | 18.00±8.55                   | 20.50±5.88                      |
| Cohort 3 (E)                                      | 21.60±5.58           | 22.26±5.75         | 22.12±5.42                   | 19.94±6.41                      |
| <b><u>D21 ipsilateral</u></b>                     |                      |                    |                              |                                 |
| <b>D21 ipsilateral</b>                            | <b>19.47</b>         | <b>12.71</b>       | <b>12.69</b>                 | <b>7.17</b>                     |

|                             |              |              |              |                    |
|-----------------------------|--------------|--------------|--------------|--------------------|
| <b><u>PWT (g)</u></b>       |              |              |              |                    |
| Cohort 1 (M)                | 22.38±6.97   | 15.70±5.89   | 13.63±3.89   | 8.00±6.46          |
| Cohort 2 (N)                | 20.09±7.01   | 14.44±8.76   | 17.14±9.35   | 10.25±3.24         |
| Cohort 3 (E)                | 17.47±7.60   | 10.32±5.15   | 10.41±4.15   | 5.33±3.82          |
|                             |              |              |              |                    |
| <b><u>Mean Δ</u></b>        | <b>-0.44</b> | <b>-1.68</b> | <b>-1.44</b> | <b>-3.22</b>       |
| <b><u>ipsilateral</u></b>   |              | <b>#</b>     | <b>#</b>     | <b>####, *, ++</b> |
| <b><u>PWT (vFH)</u></b>     |              |              |              |                    |
| Cohort 1 (M)                | -0.13±0.99   | -0.88±0.99   | -0.88±1.73   | -2.90±1.29         |
| Cohort 2 (N)                | -0.36±1.03   | -1.78±1.48   | -0.57±1.81   | -1.76±1.16         |
| Cohort 3 (E)                | -0.67±1.18   | -2.11±1.45   | -2.06±1.34   | -4.06±2.15         |
|                             |              |              |              |                    |
| <b><u>Basal</u></b>         |              |              |              |                    |
| <b><u>contralateral</u></b> | <b>22.29</b> | <b>24.31</b> | <b>21.33</b> | <b>20.95</b>       |
| <b><u>PWT (g)</u></b>       |              |              |              |                    |
| Cohort 1 (M)                | 21.25±6.73   | 26.00±0.00   | 21.88±5.69   | 21.11±5.80         |
| Cohort 2 (N)                | 23.00±5.14   | 26.00±0.00   | 19.75±8.65   | 21.88±5.69         |
| Cohort 3 (E)                | 22.33±5.37   | 22.53±5.25   | 21.82±5.94   | 20.50±5.64         |
|                             |              |              |              |                    |
| <b><u>Day 21</u></b>        |              |              |              |                    |
| <b><u>contralateral</u></b> | <b>23.41</b> | <b>24.08</b> | <b>13.18</b> | <b>9.68</b>        |
| <b><u>PWT (g)</u></b>       |              |              |              |                    |
| Cohort 1 (M)                | 24.63±3.89   | 26.00±0.00   | 15.75±5.25   | 8.56±2.70          |
| Cohort 2 (N)                | 23.00±5.14   | 23.00±5.14   | 14.63±8.18   | 10.50±6.48         |
| Cohort 3 (E)                | 23.07±5.04   | 23.68±4.61   | 11.29±3.02   | 9.85±4.89          |
|                             |              |              |              |                    |
| <b><u>Mean Δ</u></b>        | <b>0.12</b>  | <b>-0.03</b> | <b>-1.21</b> | <b>-2.06</b>       |

|                                                           |                        |                        |                                |                            |
|-----------------------------------------------------------|------------------------|------------------------|--------------------------------|----------------------------|
| <b><u>contralateral</u></b>                               |                        | ####                   | ####, ++++                     | ####, ++++                 |
| <b><u>PWT (vFH)</u></b>                                   |                        |                        |                                |                            |
| Cohort 1 (M)                                              | 0.38±0.92              | 0.00±0.00              | -1.00±1.41                     | -2.20±1.03                 |
| Cohort 2 (N)                                              | 0.00±0.77              | -0.30±0.48             | -0.88±1.13                     | -1.75±1.16                 |
| Cohort 3 (E)                                              | 0.07±0.70              | 0.11±0.46              | -1.47±0.80                     | -2.11±1.18                 |
| <b><u>Basal Anxiety (open arm AUC)</u></b>                |                        |                        |                                |                            |
| Cohort 3 (E)                                              | 33.60<br>(19.20-58.87) |                        | 17.40<br>(4.92-31.68)<br>^^    |                            |
| <b><u>Anxiety Post-Model Induction (open arm AUC)</u></b> |                        |                        |                                |                            |
| Cohort 3 (E)                                              | 16.56<br>(4.40-24.84)  | 32.16<br>(15.46-50.61) | 1.38<br>(0.03-3.96)<br>##, +++ | 2.58<br>(0.12-14.40)<br>++ |

**Lillywhite & Woodhams et al, 2020 - Table 1 – Summary of animal numbers and behavioural data**

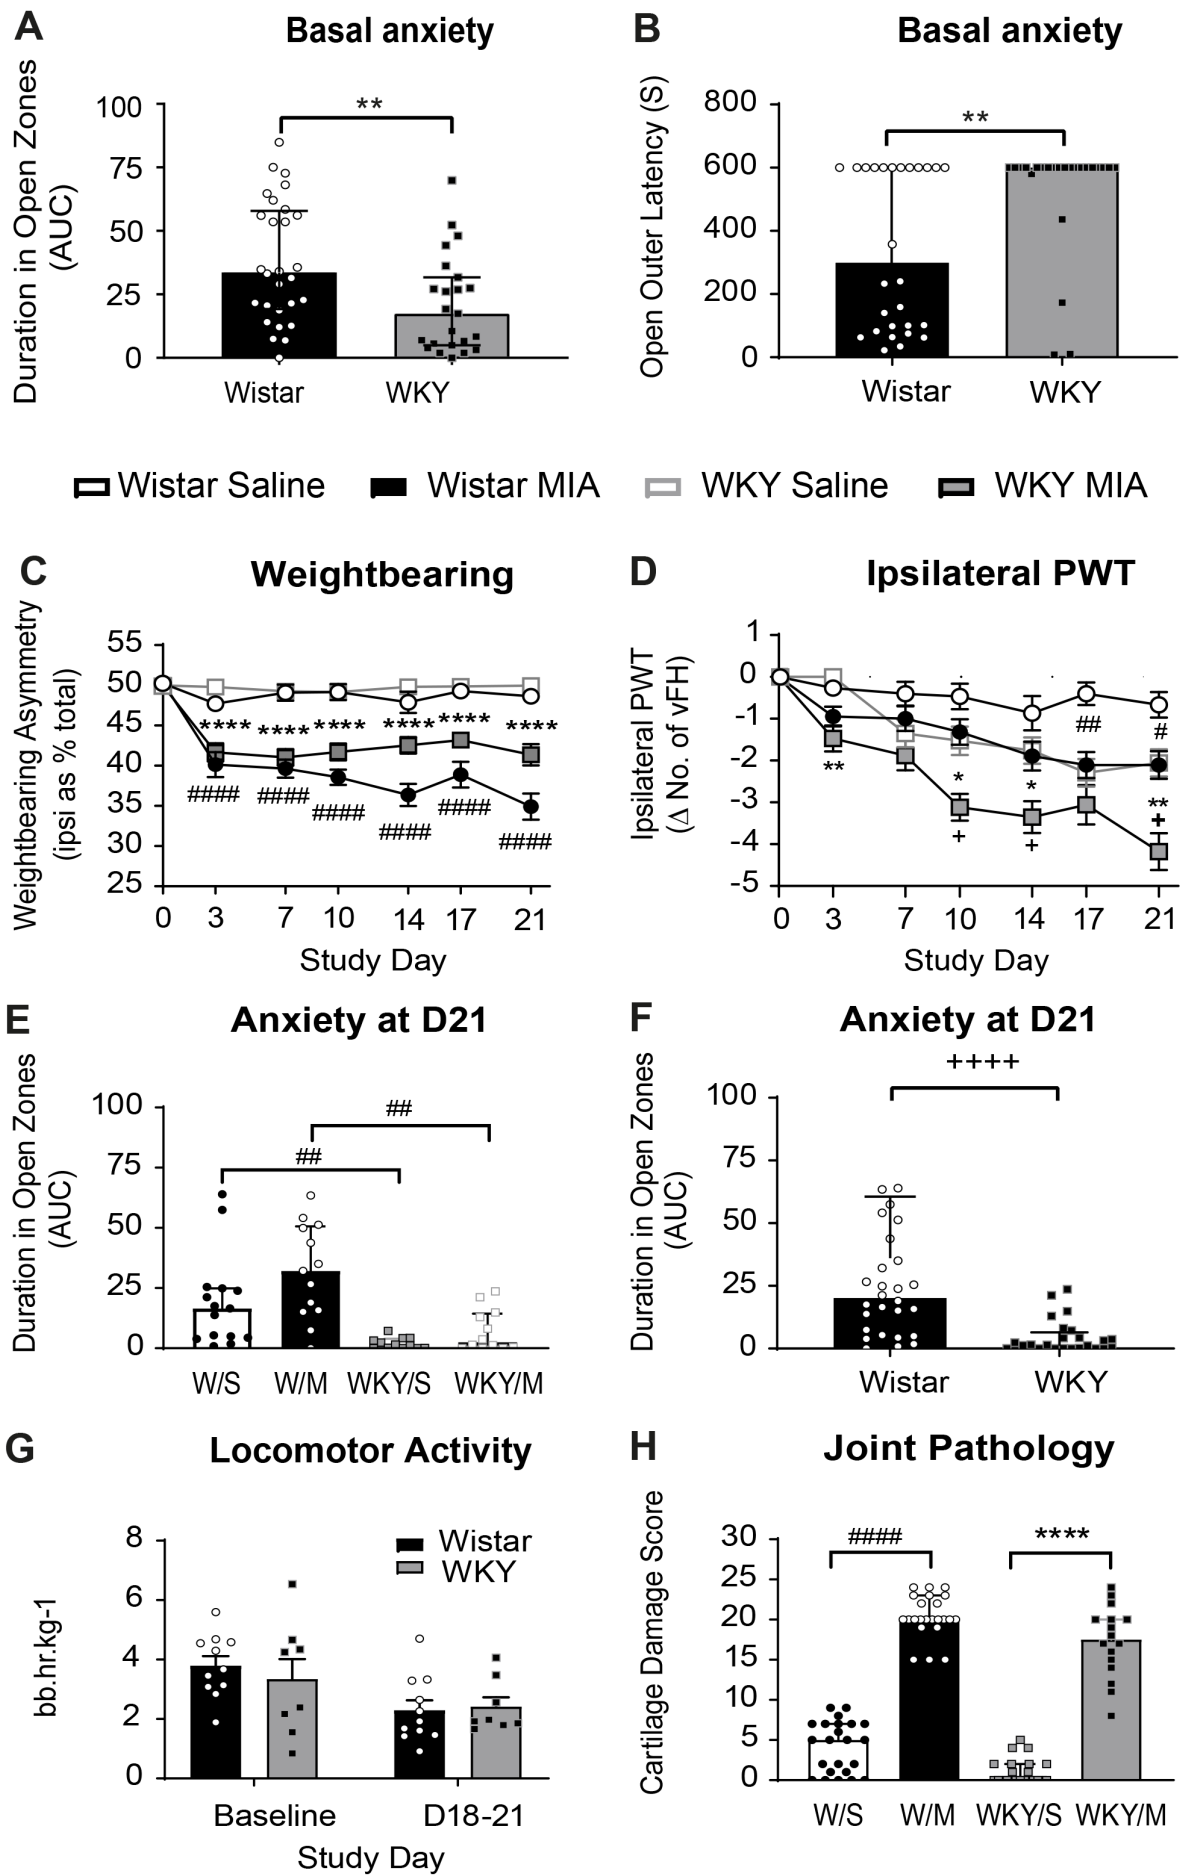

Figure 1 - Lillywhite & Woodhams et al, 2020

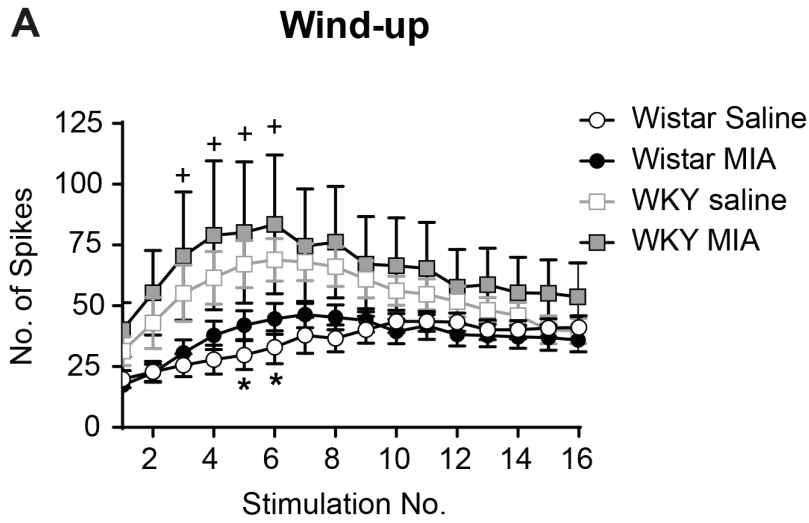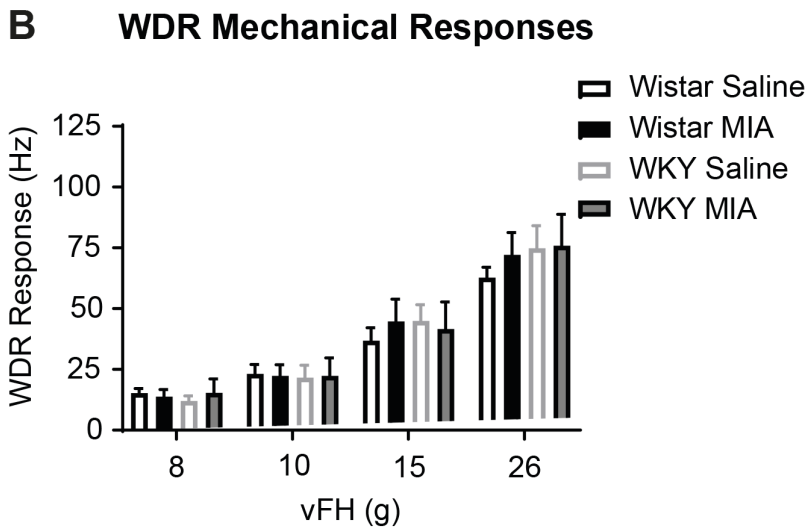

Figure 2 - Lillywhite & Woodhams et al, 2020

## Behavioural Response

■ Wistar    ■ WKY

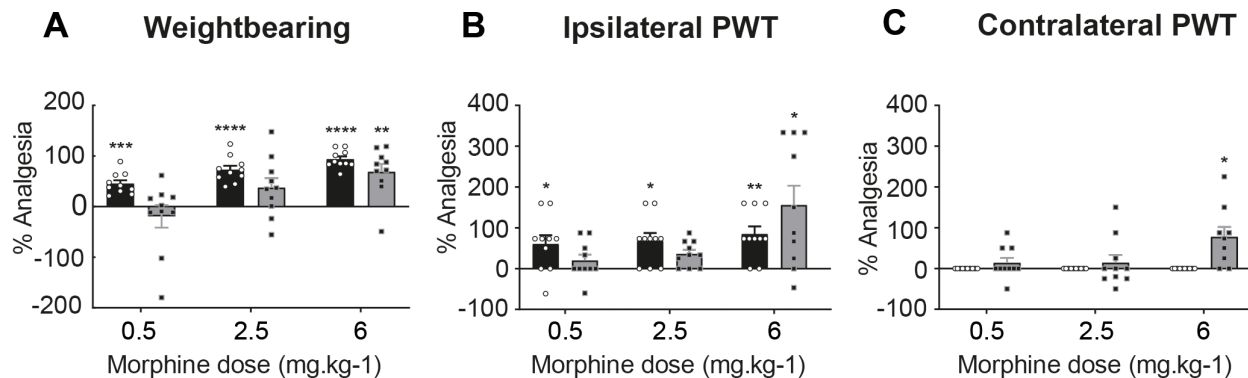

## Neuronal Response

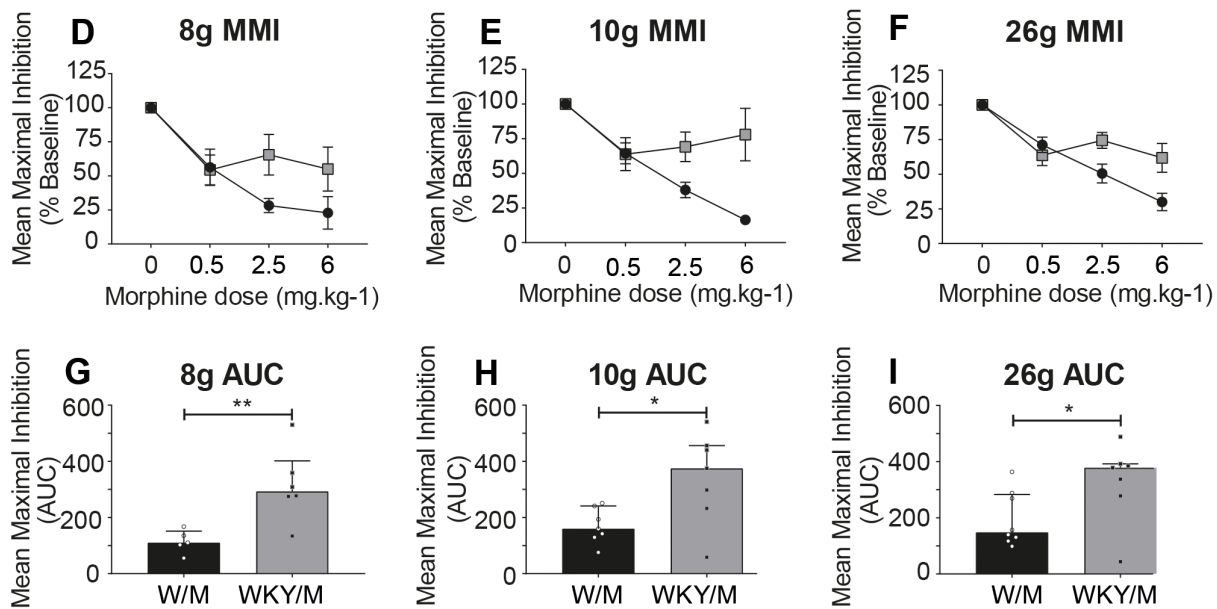

Figure 3 - Lillywhite & Woodhams et al, 2020

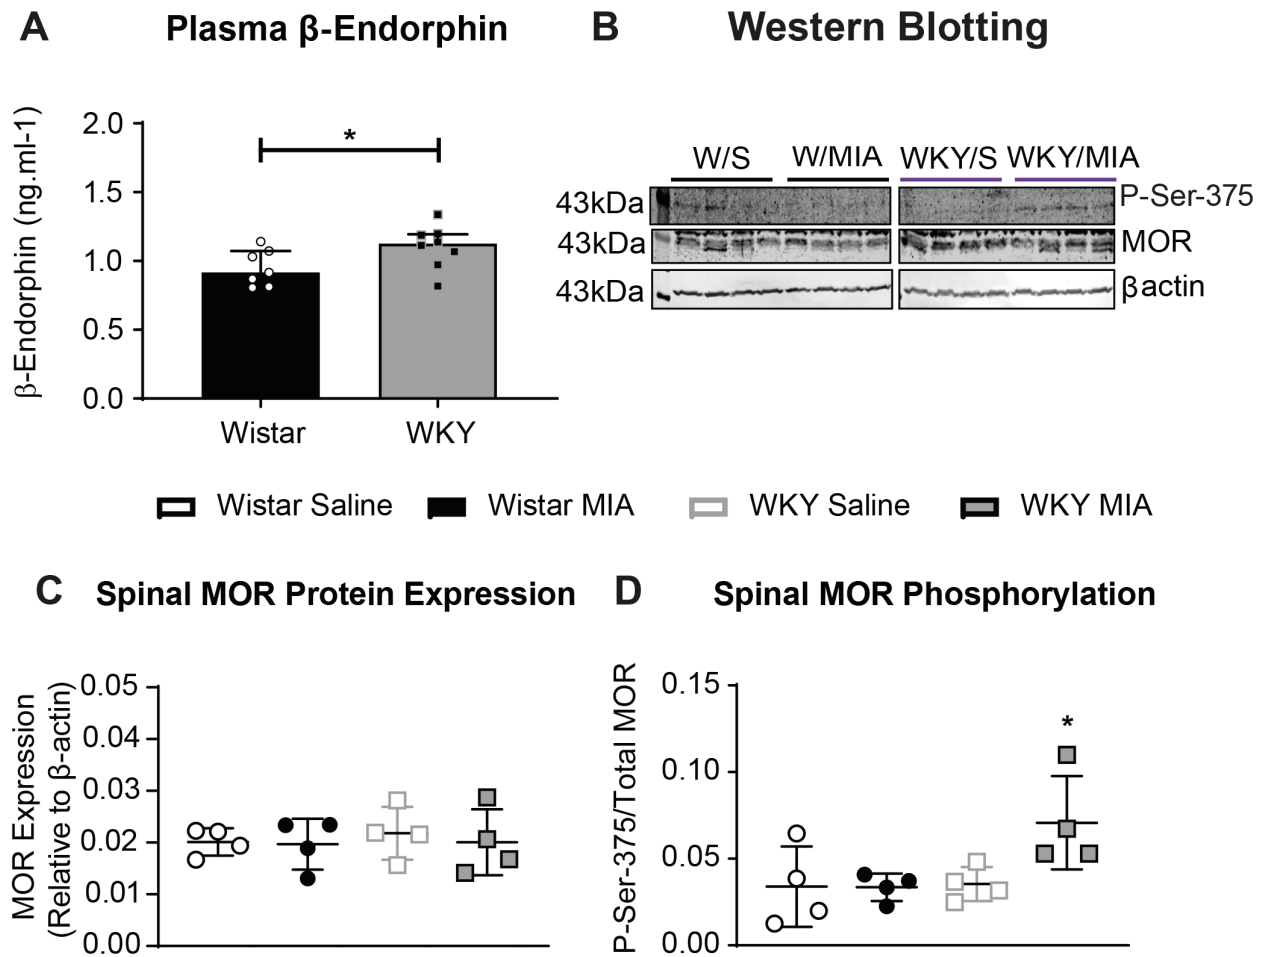

Figure 4 - Lillywhite & Woodhams et al, 2020



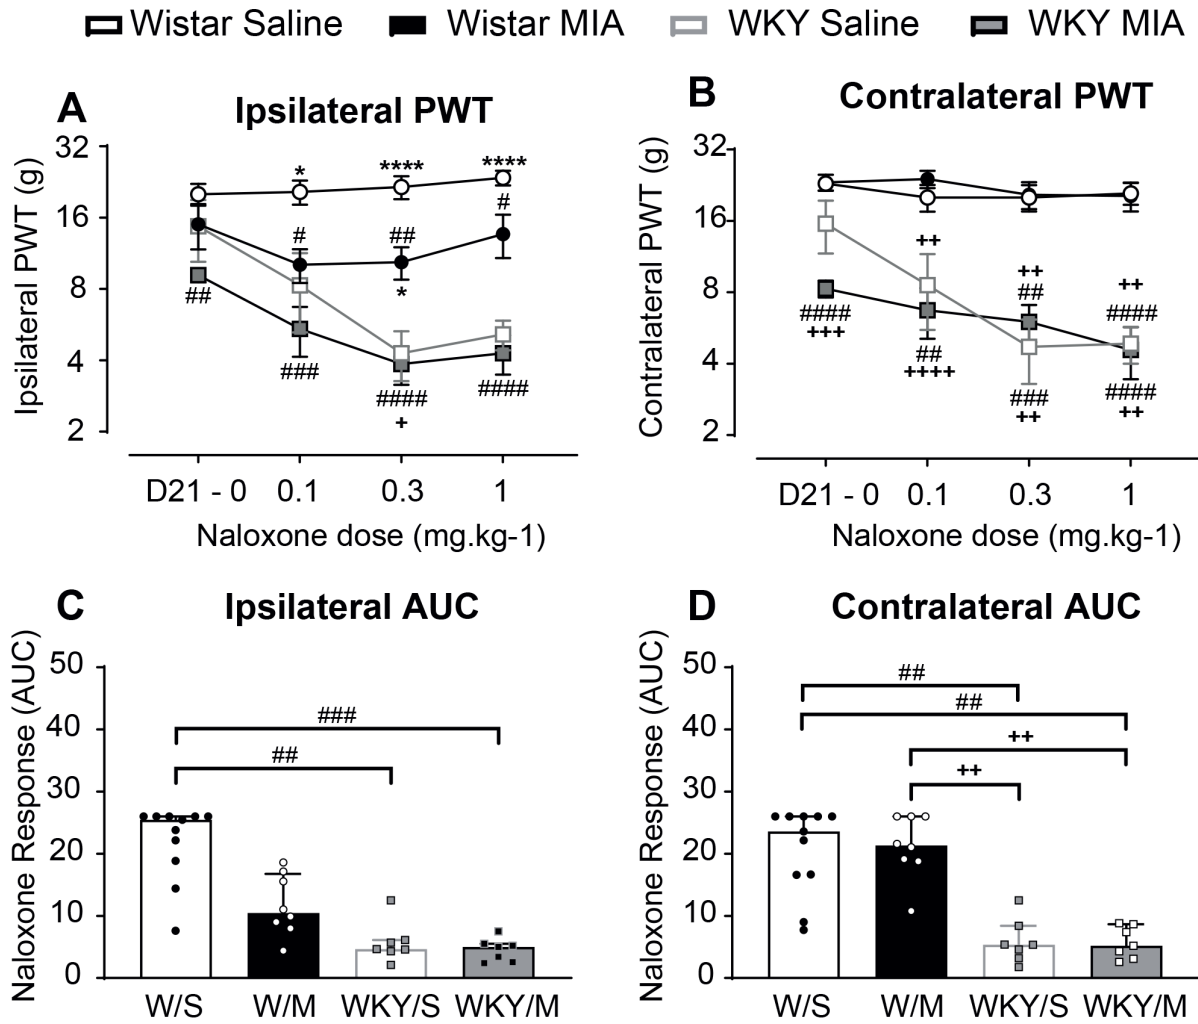

Figure 5 - Lillywhite & Woodhams et al, 2020
